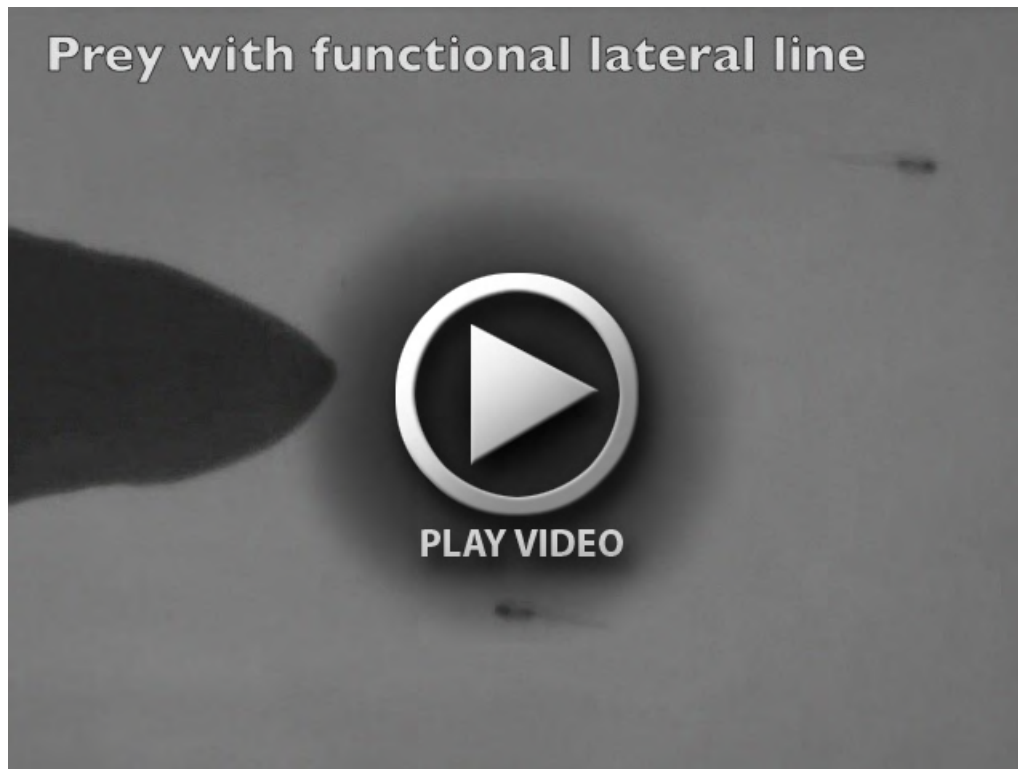

**Movie 1.** Responses of larvae with a functional lateral line system. A video recording from the lateral camera of our robotic predator (Fig. 1) recorded larvae in the dark, using IR illumination and an IR-sensitive camera. This recording shows representative 'fast start' responses of larvae to the robot.

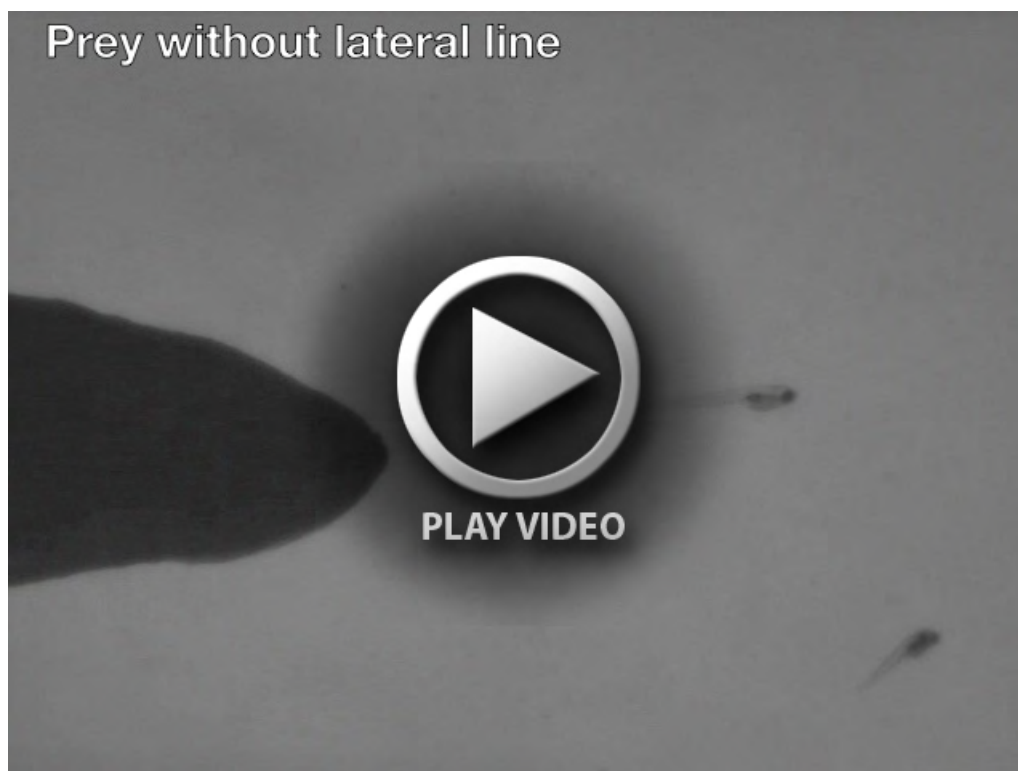

**Movie 2.** Responses of larvae without a functional lateral line system. As in Movie 1, we recorded the responses of larvae to the robot in the dark. However, in this experiment larvae were treated with an ototoxic antibiotic that compromised the functioning of the lateral line system. As a consequence, the larvae failed to sense the predator's approach and was consequently swept aside.
